# Supplementary material for: The Detection of Active Sinkholes by Airborne Differential LiDAR DEMs and InSAR Cloud Computing Tools
Source: MDPI journal article supplement (doi:10.3390/rs13163261), 2021-08-18

## SUPPLEMENTARY MATERIAL

Table S1. Main characteristics of the SAR Envisat Dataset processing and surface velocity maps.

| SBAS ENVISAT                                  |                                |                             |  |
|-----------------------------------------------|--------------------------------|-----------------------------|--|
|                                               |                                |                             |  |
| SAR ADQUISITION                               |                                |                             |  |
| Band/Polarisation                             | C/VV                           |                             |  |
| Wavelength (cm)                               | 5.6                            |                             |  |
| Incidence angle                               | 23                             |                             |  |
| Revisiting period (days)                      | 35                             |                             |  |
| Orbital track/Frame                           | 152/58                         | 101/152                     |  |
| Acquisition geometry                          | Ascending                      | Descending                  |  |
| Pixel size (m) radar geometry                 | 4x20                           |                             |  |
|                                               |                                |                             |  |
| SAR PROCESSING                                |                                |                             |  |
| Number of SAR images                          | 25                             | 29                          |  |
| Temporal span                                 | June 2004/September 2010       | March 2003/September 2010   |  |
| Number of interferograms                      | 63                             | 85                          |  |
| Bounding box (Lat, Long, proj.WGS84)          | 41.99, -1.36 / 41.279, -0.007  | 41.99, -1.17 / 41.51, -0.29 |  |
| Reference point coord (Lat, Long; proj.WGS84) | 41.65, -0.87                   |                             |  |
| Processing mode                               | Multi-Temporal DInSAR Analysis |                             |  |
| Max Perpendicular Baseline (m)                | 400                            |                             |  |
| Max Temporal Baseline (days)                  | 1500                           |                             |  |
| Ground Pixel Dimension (m)                    | 80, 80                         |                             |  |
| Max Allowed Delta-Doppler (Hz)                | 1000                           |                             |  |
| Max Allowed Doppler Centroid (Hz)             | 2000                           |                             |  |
| GoldsteinWeight                               | 0.5                            |                             |  |
| Coherence threshold                           | 0.7                            |                             |  |
| APS Smoothing TimeWindow (days)               | 200                            |                             |  |

Table S2. Main characteristics of the SAR SBAS Sentinel Dataset processing and surface velocity maps.

| SBAS SERVICE- SENTINEL        |                                                                                                                       |                                                                                                                     |                                                                                                                   |                                                                                                                     |
|-------------------------------|-----------------------------------------------------------------------------------------------------------------------|---------------------------------------------------------------------------------------------------------------------|-------------------------------------------------------------------------------------------------------------------|---------------------------------------------------------------------------------------------------------------------|
| DDSS_ID                       | LOS_DISPLACEMENT_TIMESERIES                                                                                           |                                                                                                                     |                                                                                                                   |                                                                                                                     |
| Product_ID                    | DTSLOS_jgiturbe_20141105_20210126_8F3K                                                                                | DTSLOS_jgiturbe_20160609_20210126_9Q45                                                                              | DTSLOS_jgiturbe_20190612_20210219_CZIJ                                                                            | DTSLOS_jgiturbe_20190612_20210219_CZIJ                                                                              |
| Product_format                | ASCII                                                                                                                 |                                                                                                                     |                                                                                                                   |                                                                                                                     |
| Product_size                  | 1323062937                                                                                                            | 1041037638                                                                                                          | 3265478652                                                                                                        | 3588016971                                                                                                          |
| Preview_url                   | /Pompu/Track_103/DTSLOS_jgiturbe_20141105_20210126_8F3K/DTSLOS_jgiturbe_20141105_20210126_8F3K.png                    | /Pompu/Track_8/DTSLOS_jgiturbe_20160609_20210126_9Q45/DTSLOS_jgiturbe_20160609_20210126_9Q45.png                    | /Pompu/Track_30/DTSLOS_jgiturbe_20190625_20210226_OY0I/DTSLOS_jgiturbe_20190625_20210226_OY0I.png                 | /Pompu/Track_8/DTSLOS_jgiturbe_20190612_20210219_CZIJ/DTSLOS_jgiturbe_20190612_20210219_CZIJ.png                    |
| Legend_url                    | /Pompu/Track_103/DTSLOS_jgiturbe_20141105_20210126_8F3K/DTSLOS_jgiturbe_20141105_20210126_8F3K.legend.png             | /Pompu/Track_8/DTSLOS_jgiturbe_20160609_20210126_9Q45/DTSLOS_jgiturbe_20160609_20210126_9Q45.legend.png             | /Pompu/Track_30/DTSLOS_jgiturbe_20190625_20210226_OY0I/DTSLOS_jgiturbe_20190625_20210226_OY0I.legend.png          | /Pompu/Track_8/DTSLOS_jgiturbe_20190612_20210219_CZIJ/DTSLOS_jgiturbe_20190612_20210219_CZIJ.legend.png             |
| Product_url                   | /Pompu/Track_103/DTSLOS_jgiturbe_20141105_20210126_8F3K/DTSLOS_jgiturbe_20141105_20210126_8F3K.zip                    | /Pompu/Track_8/DTSLOS_jgiturbe_20160609_20210126_9Q45/DTSLOS_jgiturbe_20160609_20210126_9Q45.zip                    | /Pompu/Track_30/DTSLOS_jgiturbe_20190625_20210226_OY0I/DTSLOS_jgiturbe_20190625_20210226_OY0I.zip                 | /Pompu/Track_8/DTSLOS_jgiturbe_20190612_20210219_CZIJ/DTSLOS_jgiturbe_20190612_20210219_CZIJ.zip                    |
| Bounding_box                  | 41.103333 -3.4877778 / 42.299444 -0.34055556                                                                          | 41.098889 -2.4308333 / 42.339722 0.75083333                                                                         | 41.554167 -1.5291667 / 42.585556 1.6136111                                                                        | 41.098611 -2.4302778 / 42.670278 0.80277778                                                                         |
| Bounding_box_wkt              | POLYGON((-3.4877778 41.103333,-0.34055556 41.103333,-0.34055556 42.299444,-3.4877778 42.299444,-3.4877778 41.103333)) | POLYGON((-2.4308333 41.098889,0.75083333 41.098889,0.75083333 42.339722,-2.4308333 42.339722,-2.4308333 41.098889)) | POLYGON((-1.5291667 41.554167,1.6136111 41.554167,1.6136111 42.585556,-1.5291667 42.585556,-1.5291667 41.554167)) | POLYGON((-2.4302778 41.098611,0.80277778 41.098611,0.80277778 42.670278,-2.4302778 42.670278,-2.4302778 41.098611)) |
| License                       | <a href="https://creativecommons.org/licenses/by/4.0">https://creativecommons.org/licenses/by/4.0</a>                 |                                                                                                                     |                                                                                                                   |                                                                                                                     |
| Software_version              | CNR-IREA P-SBAS 28                                                                                                    |                                                                                                                     |                                                                                                                   |                                                                                                                     |
| Applied_algorithm_description | Parallel SBAS Interferometry Chain                                                                                    |                                                                                                                     |                                                                                                                   |                                                                                                                     |
| Main_reference                | 10.1109/ISTARS.2014.2322671, 10.1109/TGRS.2019.2904912                                                                |                                                                                                                     |                                                                                                                   |                                                                                                                     |
| Date_of_measurement_start     | 2014-11-05T18:02:47.371816Z                                                                                           | 2016-06-09T06:09:07.161949Z                                                                                         | 2019-06-13T17:54:32.301760Z                                                                                       | 2019-06-12T06:08:38.021799Z                                                                                         |
| Date_of_measurement_end       | 2021-01-26T18:02:38.685732Z                                                                                           | 2021-01-26T06:09:34.680956Z                                                                                         | 2021-02-20T17:54:39.993884Z                                                                                       | 2021-02-19T06:09:33.863176Z                                                                                         |
| Date                          | 2014-11-05T18:02:47.371816Z/2021-01-26T18:02:38.685732Z                                                               | 2016-06-09T06:09:07.161949Z/2021-01-26T06:09:34.680956Z                                                             | 2019-06-25T17:54:32.301760Z/2021-02-26T17:54:39.993884Z                                                           | 2019-06-12T06:08:38.021799Z/2021-02-19T06:09:33.863176Z                                                             |
| Date_of_production            | 2021-02-12T01:56:09Z                                                                                                  | 2021-02-04T20:30:32Z                                                                                                | 2021-05-24T18:42:46Z                                                                                              | 2021-03-03T09:24:19Z                                                                                                |
| Service_used_for_generation   | EPOSAR                                                                                                                |                                                                                                                     |                                                                                                                   |                                                                                                                     |
| Geographic_CS_type_code       | EPSG_4326                                                                                                             |                                                                                                                     |                                                                                                                   |                                                                                                                     |
| Used_DEM                      | SRTM_1arcsec                                                                                                          |                                                                                                                     |                                                                                                                   |                                                                                                                     |
| Super_master_SAR_image_ID     | S1B_IW_SLC__1SDV_20180130T180219_20180130T180246_009404_010E50_FA99.SAFE                                              | S1A_IW_SLC__1SDV_20180927T060924_20180927T060951_023880_029B31_03D3.SAFE                                            | S1B_IW_SLC__1SDV_20200514T175436_20200514T175504_021581_028F88_C06C.SAFE                                          | S1A_IW_SLC__1SDV_20200507T060929_20200507T060956_032455_03C224_6D40.SAFE                                            |
| Spatial_resolution            | 90, 90                                                                                                                |                                                                                                                     |                                                                                                                   |                                                                                                                     |
| Sensor                        | S1                                                                                                                    |                                                                                                                     |                                                                                                                   |                                                                                                                     |
| Mode                          | IW                                                                                                                    |                                                                                                                     |                                                                                                                   |                                                                                                                     |
| Antenna_side                  | Right                                                                                                                 |                                                                                                                     |                                                                                                                   |                                                                                                                     |
| Relative_orbit_number         | 103                                                                                                                   | 8                                                                                                                   | 30                                                                                                                | 8                                                                                                                   |
| Orbit_direction               | ASCENDING                                                                                                             | DESCENDING                                                                                                          | ASCENDING                                                                                                         | DESCENDING                                                                                                          |
| Wavelength                    | 0.05546576                                                                                                            |                                                                                                                     |                                                                                                                   |                                                                                                                     |
| Value_unit                    | N/A, deg, deg, m, cm/yr, N/A, N/A, N/A, N/A, cm                                                                       |                                                                                                                     |                                                                                                                   |                                                                                                                     |
| Number_of_looks_azimuth       | 5                                                                                                                     |                                                                                                                     |                                                                                                                   |                                                                                                                     |
| Number_of_looks_range         | 20                                                                                                                    |                                                                                                                     |                                                                                                                   |                                                                                                                     |

|                      |                         |                        |                         |                        |
|----------------------|-------------------------|------------------------|-------------------------|------------------------|
| Applied_filter       | Goldstein_0.50          |                        |                         |                        |
| Number_of_SAR Images | 74                      | 51                     | 100                     |                        |
| Reference_date       | 2014-11-05T18:02:47Z    | 2016-06-09T06:09:07Z   | 2019-06-25T17:54:32Z    | 2019-06-12T06:08:38Z   |
| Reference_point      | 43.283572 / -0.75918026 | 40.634330 / -1.7713063 | 41.803843 / -0.35949912 | 41.707304 / -1.5339751 |
| Applied_corrections  | No_Corrections          |                        |                         |                        |

Table S3. Main characteristics of the SAR FASTVEL Sentinel Dataset processing and surface velocity maps.

| FASTVEL SERVICE_SENTINEL                     |                                                      |                                                          |                                                            |                                                      |
|----------------------------------------------|------------------------------------------------------|----------------------------------------------------------|------------------------------------------------------------|------------------------------------------------------|
| Job name                                     | FASTVEL ZAR<br>Jul2019-<br>Mar2021<br>SmallAOI       | FASTVEL<br>Alcala<br>Jul2019-<br>Mar2021<br>SmallAOI     | FASTVEL<br>UteboAlago<br>n Jul2019-<br>Mar2021<br>SmallAOI | FASTVEL<br>Zuera<br>Jul2019-<br>Mar2021<br>SmallAOI  |
| ID                                           | f584d832-<br>15d3-4d84-<br>89f6-<br>3b767514239<br>6 | f18692ba-<br>564f-<br>4097-<br>865c-<br>69107815<br>1dfa | 5bbfc07b-<br>b84d-4135-<br>ae25-<br>8e322a86a8<br>18       | 6e21a7d7-<br>b99f-43a8-<br>afcc-<br>43ee05eb3b<br>1a |
|                                              |                                                      |                                                          |                                                            |                                                      |
| SAR ACQUISITION                              |                                                      |                                                          |                                                            |                                                      |
| Sensor                                       | S1                                                   |                                                          |                                                            |                                                      |
| Mode                                         | IW                                                   |                                                          |                                                            |                                                      |
| Product Type                                 | SLC                                                  |                                                          |                                                            |                                                      |
| Orbit_direction                              | DESCENDING                                           |                                                          |                                                            |                                                      |
| Track                                        | 8                                                    |                                                          |                                                            |                                                      |
| Date_of_measurement_start                    | 2019-07-12T06:09:53.97                               |                                                          |                                                            |                                                      |
| Date_of_measurement_end                      | 2021-03-21T06:09:13.556                              |                                                          |                                                            |                                                      |
| Geographic_CS_type_code                      | EPSG_4326                                            |                                                          |                                                            |                                                      |
|                                              |                                                      |                                                          |                                                            |                                                      |
| SAR PROCESSING                               |                                                      |                                                          |                                                            |                                                      |
| Spatial_resolution                           | 40, 40                                               |                                                          |                                                            |                                                      |
| Number_of_SAR Images                         | 100                                                  |                                                          |                                                            |                                                      |
| Processing mode                              | MTA                                                  |                                                          |                                                            |                                                      |
| Area of interest                             | -<br>0.979,41.625,<br>-0.86,41.692                   | -<br>1.251,41.7<br>59,-<br>1.109,41.8<br>34              | -<br>1.133,41.65<br>4,-<br>0.935,41.78<br>2                | -<br>0.829,41.87<br>1,-<br>0.713,41.92<br>7          |
| Reference_point_lat                          | 41.653                                               | 41.786                                                   | 41.681                                                     | 41.888                                               |
| Ref_point_lon                                | -0.877                                               | -1.219                                                   | -1.072                                                     | -0.763                                               |
| Maximum Temporal Baseline<br>[days]          | 365                                                  |                                                          |                                                            |                                                      |
| Maximum Perpendicular Baseline<br>[m]        | 400                                                  |                                                          |                                                            |                                                      |
| Maximum Doppler Difference [Hz]              | 1000                                                 |                                                          |                                                            |                                                      |
| Maximum Doppler Centroid [Hz]                | 2000                                                 |                                                          |                                                            |                                                      |
| Goldstein phase filter exponential<br>factor | 0.5                                                  |                                                          |                                                            |                                                      |
| Phase Unwrapping                             | False                                                |                                                          |                                                            |                                                      |
| Coherence Threshold                          | 0.5                                                  |                                                          |                                                            |                                                      |
| APS Correlation Distance [m]                 | 3000                                                 |                                                          |                                                            |                                                      |

Table S4. Chemical composition, total dissolved solids (TDS), alkalinity (Alk) and saturation indexes (si) performed with the PHREEQC software and the Pitzer database for the Zuera sinkholes water samples.

| Western sinkhole sample 1 | T <sup>a</sup> | pH   | TDS (mg/l) | ppm HCO <sub>3</sub> <sup>-</sup> | ppm Cl <sup>-</sup> | ppm SO <sub>4</sub> <sup>2-</sup> | ppm Ca      | ppm Mg    | ppm Na    | ppm K                  |
|---------------------------|----------------|------|------------|-----------------------------------|---------------------|-----------------------------------|-------------|-----------|-----------|------------------------|
|                           | 13.5           | 7.8  | 92296      | 183.88                            | 52600               | 3294                              | 1649        | 131       | 34400     | 38                     |
|                           |                |      | Alk        | Ionic balance                     | Ionic Strength      | si_Calcite                        | si_Dolomite | si_Gypsum | si_Halite | si_CO <sub>2</sub> (g) |
|                           |                |      | 0.0030855  | 1.12                              | 1.69313             | 1.0021                            | 1.2273      | -0.2406   | -1.567    | -2.8596                |
| Western sinkhole sample 2 | T <sup>a</sup> | pH   | TDS (mg/l) | ppm HCO <sub>3</sub> <sup>-</sup> | ppm Cl <sup>-</sup> | ppm SO <sub>4</sub> <sup>2-</sup> | ppm Ca      | ppm Mg    | ppm Na    | ppm K                  |
|                           | 13             | 8.06 | 94716      | 136.04                            | 53900               | 3680                              | 1813        | 142       | 35000     | 45                     |
|                           |                |      | Alk        | Ionic balance                     | Ionic Strength      | si_Calcite                        | si_Dolomite | si_Gypsum | si_Halite | si_CO <sub>2</sub> (g) |
|                           |                |      | 0.0022837  | 0.82                              | 1.74325             | 1.1462                            | 1.5107      | -0.1618   | -1.5476   | -3.273                 |
| Eastern Sinkhole          | T <sup>a</sup> | pH   | TDS (mg/l) | ppm HCO <sub>3</sub> <sup>-</sup> | ppm Cl <sup>-</sup> | ppm SO <sub>4</sub> <sup>2-</sup> | ppm Ca      | ppm Mg    | ppm Na    | ppm K                  |
|                           | 11             | 7.7  | 1974       | 455.95                            | 153                 | 837.5                             | 247.6       | 139       | 127.4     | 13.95                  |
|                           |                |      | Alk        | Ionic balance                     | Ionic Strength      | si_Calcite                        | si_Dolomite | si_Gypsum | si_Halite | si_CO <sub>2</sub> (g) |
|                           |                |      | 0.0074873  | 0.74                              | 0.0501455           | 0.7699                            | 1.5583      | -0.4941   | -6.3203   | -2.1828                |

Table S5. Average vertical rates derived from the InSAR and DoD maps along the A23 Highway in Zuera Sinkhole site.

| <b>INSAR (SBAS SENTINEL)</b>                      |                             |                           |
|---------------------------------------------------|-----------------------------|---------------------------|
| <b>Vertical motion rate</b>                       | <b>Area (m<sup>2</sup>)</b> | <b>Subsidence (cm/yr)</b> |
| 3.71                                              | 8046.81                     | 29853.67                  |
| 2.41                                              | 830.996                     | 2002.7                    |
| 2.36                                              | 122.475                     | 289.04                    |
| <b>Total</b>                                      | 9000.281                    | 32145.41                  |
| <b>Average Subsidence (cm/yr · m<sup>2</sup>)</b> |                             | <b>3.57</b>               |

| <b>DIFFERENTIAL LiDAR DEMS (2010-2016)</b>        |                             |                           |
|---------------------------------------------------|-----------------------------|---------------------------|
| <b>Number of points</b>                           | <b>Area (m<sup>2</sup>)</b> | <b>Subsidence (cm/yr)</b> |
| 9003                                              | 9000.281                    | -64781.86                 |
| <b>Average Subsidence (cm/yr · m<sup>2</sup>)</b> |                             | <b>-7.19</b>              |

Figure S1. Vertical deformation rate of the InSAR data obtained from the 2019-2021 sentinel-1 images and the SBAS Sentinel approach.

Figure 1 shows the vertical deformation map for the SBAS Sentinel approach in the Zuera sinkhole site derived from the Sentinel-1 data. The maximum deformation rates range between -1 and -2 cm/yr for the western sinkhole and -3 and -4 cm/year for the eastern sinkhole with maximum negative values on the southern edge of the lake and along the A22 Highway and N330 Road. This is consistent with the severe damage recorded in these infrastructures and the surface deformation features recognized in the field (Desir et al., 2018). The InSAR and differential LiDAR deformation pattern is similar for the western sinkhole although the vertical deformation rates obtained by the SBAS Sentinel approach are around 2 times lower.

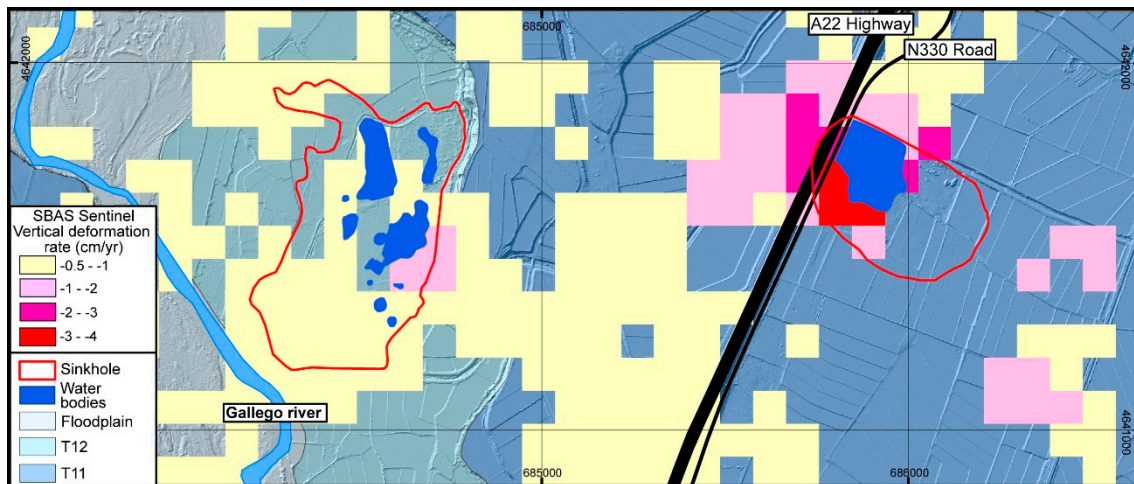

Figure S2. LOS velocity and vertical deformation rates of the detailed area around Zaragoza city from the 2003-2010 Envisat SAR images and the SBAS Envisat approach.

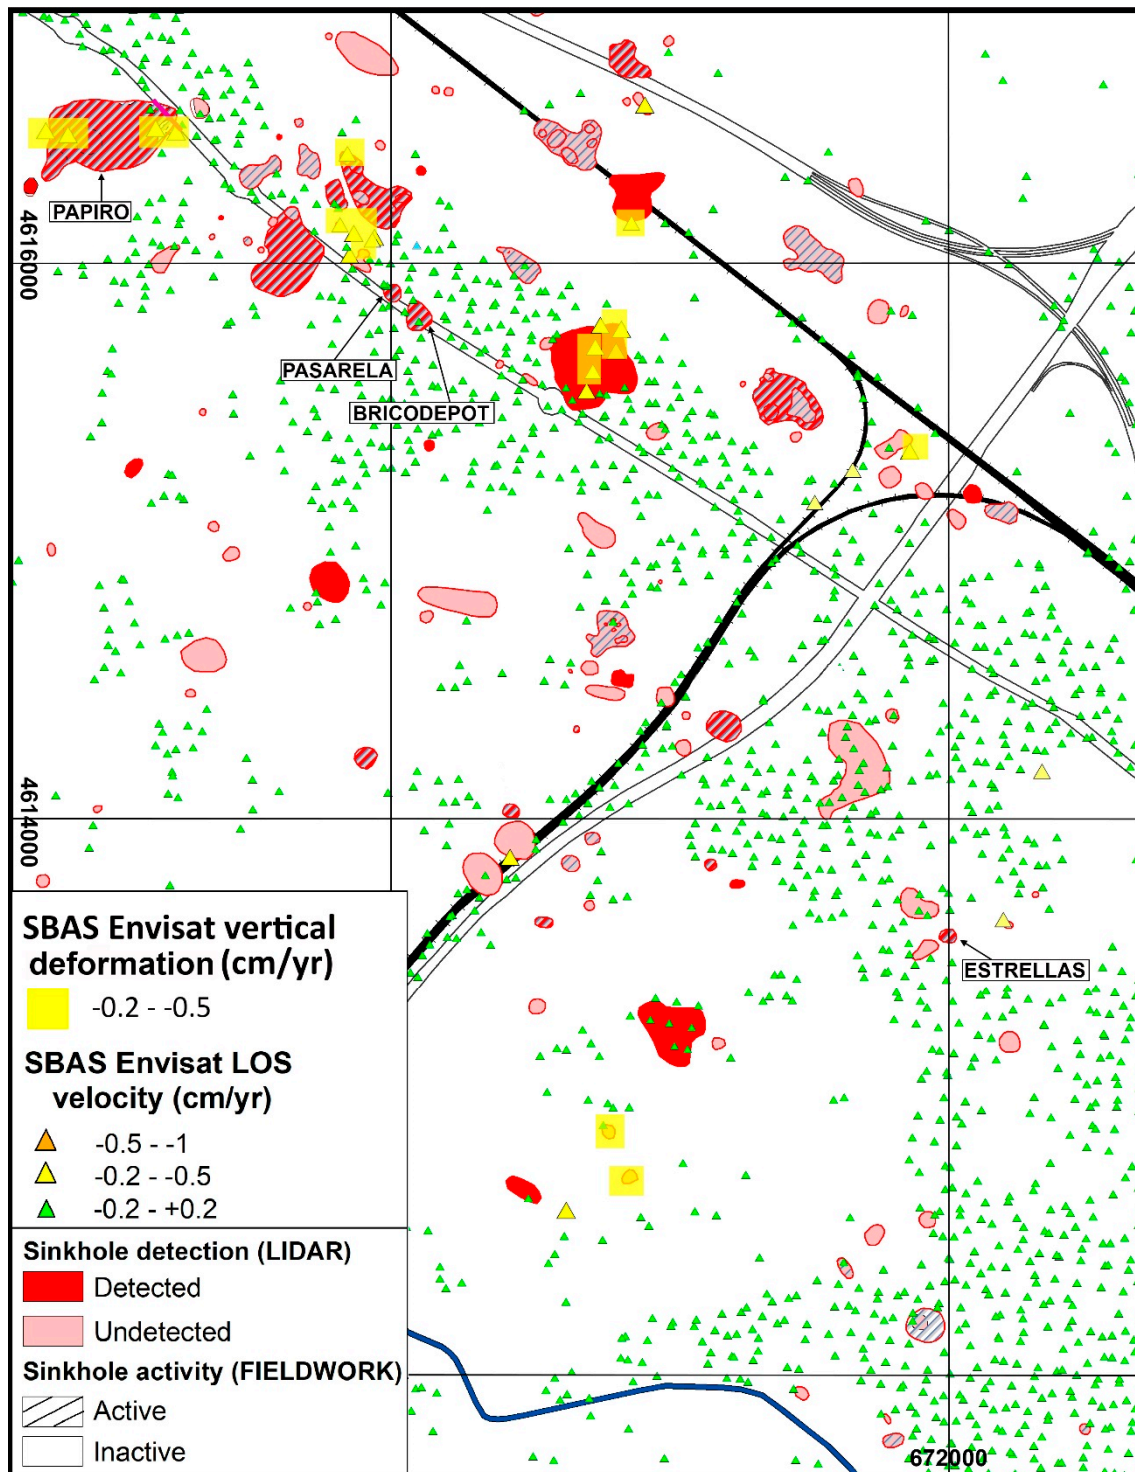



Figure S3. LOS vertical deformation map of the detailed area around Zaragoza city from the 2019-2021 Sentinel-1 SAR images and the FASTVEL Sentinel approach.

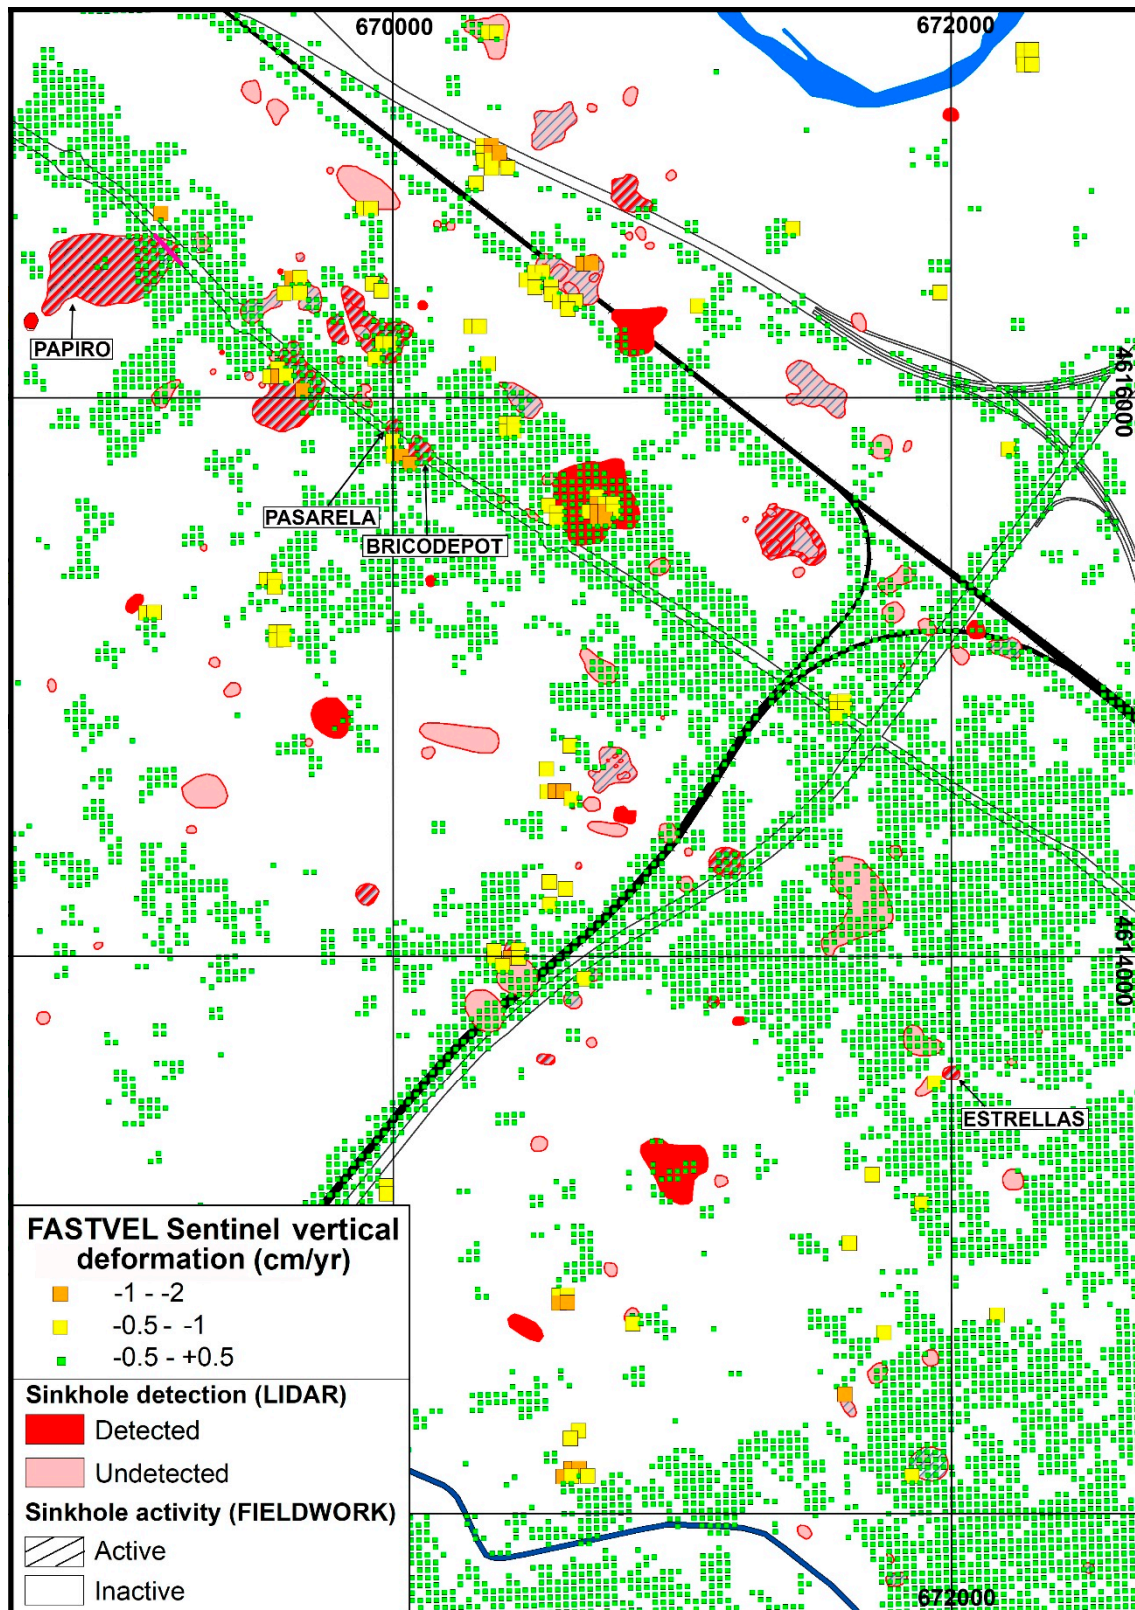

Supplement: s1 [file s1]
